# Supplementary material for: Slowdown of Translational Elongation in Escherichia coli under Hyperosmotic Stress
Source: PubMed Central journal article supplement (PMC5821080; doi:10.1128/mbio.02375-17), 2018-02-13

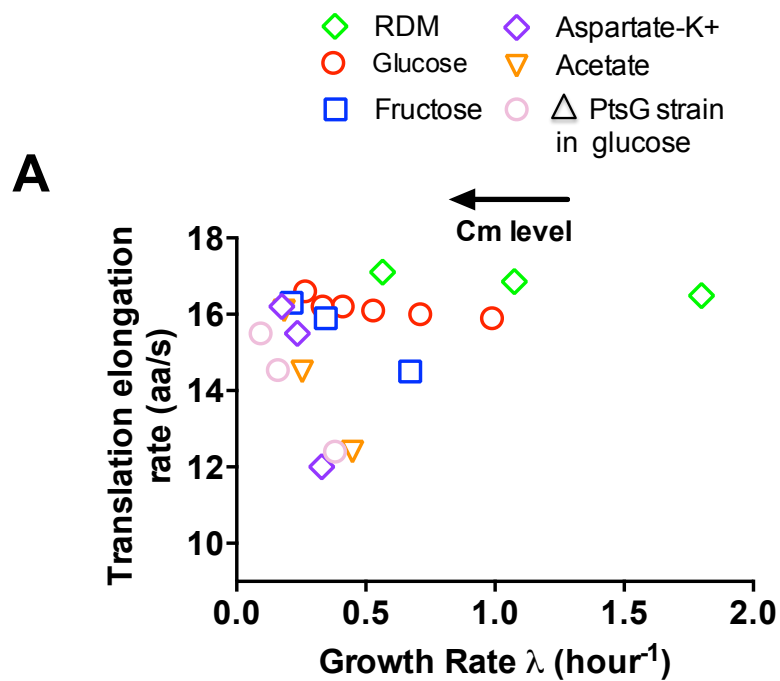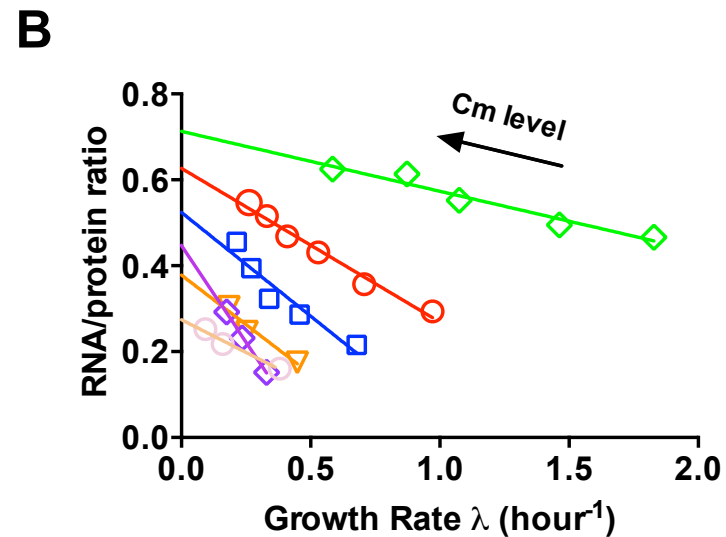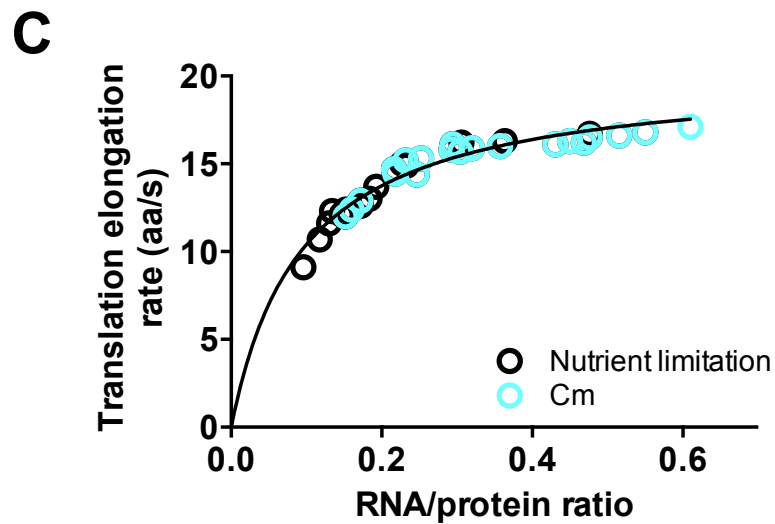

Supplement: mbo001183718sf5.pdf [file mbo001183718sf5.pdf]
