# Supplementary material for: Slowdown of Translational Elongation in Escherichia coli under Hyperosmotic Stress
Source: PubMed Central journal article supplement (PMC5821080; doi:10.1128/mbio.02375-17), 2018-02-13

GFP diffusion coefficient  
( $\mu\text{m}^2/\text{s}$ )

15  
10  
5  
0

0.0

0.5

1.0

1.5

2.0

External Osmolarity (OSM)

$K_{on}$  ( $\mu\text{M}^{-1}\text{s}^{-1}$ )

8

6

4

2

0

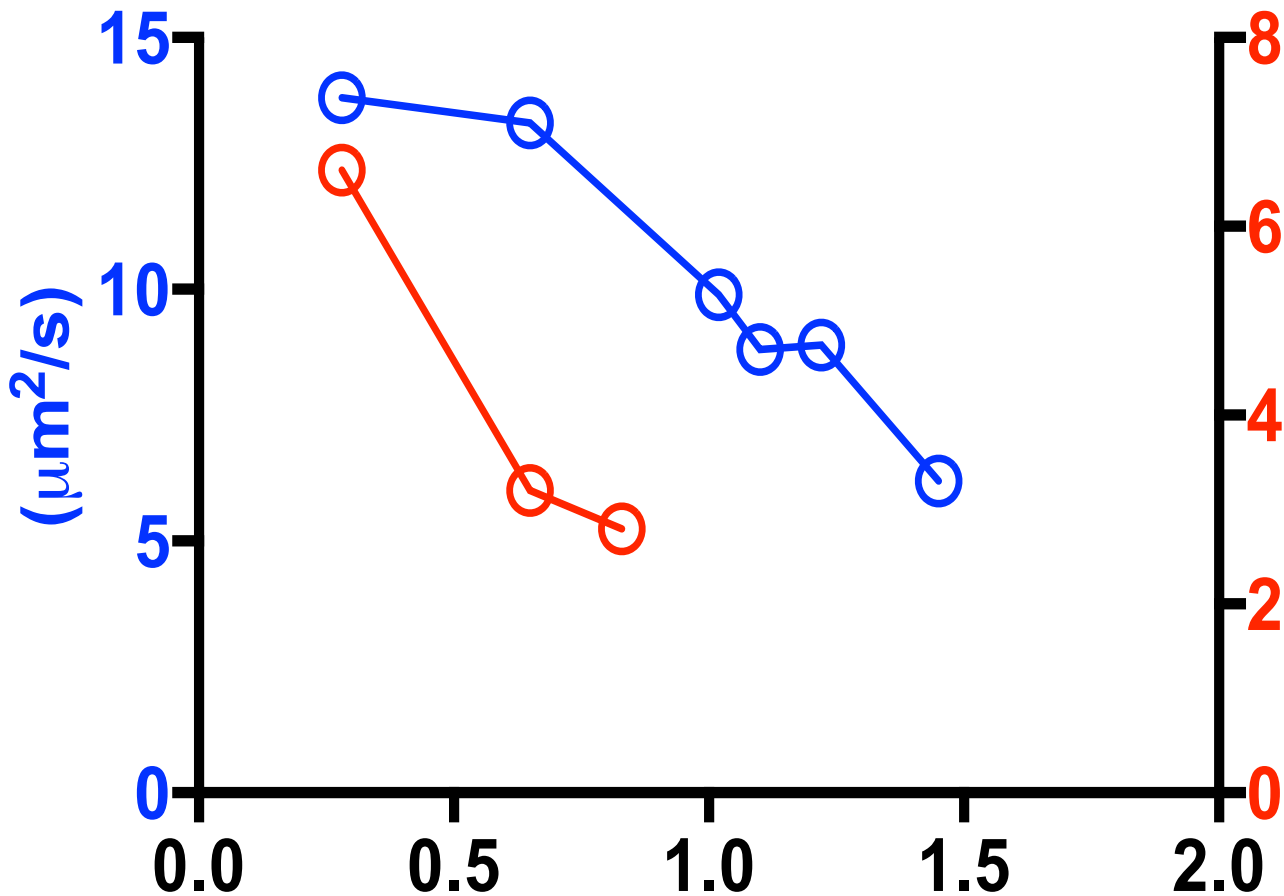

Supplement: mbo001183718sf9.pdf [file mbo001183718sf9.pdf]
